# Supplementary material for: Synthesis and Antiproliferative Effect of Halogenated Coumarin Derivatives
Source: MDPI journal article supplement (doi:10.3390/molecules27248897), 2022-12-14

## ***Supporting Information***

### **Synthesis and antiproliferative effect of halogenated coumarin derivatives.**

**Tinuccia Dettori<sup>1‡</sup>, Giuseppina Sanna<sup>1‡</sup>, Andrea Cocco<sup>2‡</sup>, Gabriele Serreli<sup>1</sup>, Monica Deiana<sup>1</sup>, Vanessa Palmas<sup>1</sup>, Valentina Onnis<sup>3</sup>, Luca Pilia<sup>4</sup>, Nicola Melis<sup>4</sup>, Davide Moi<sup>2,3\*</sup>, Paola Caria<sup>1\*</sup> and Francesco Secci<sup>2\*</sup>.**

<sup>1</sup>Department of Biomedical Sciences, University of Cagliari, Cittadella Universitaria, SS 554, km 4.5, 09042 Monserrato, Italy

<sup>2</sup>Department of Chemical and Geological Sciences, University of Cagliari, Cittadella Universitaria, SS 554, km 4.5, 09042 Monserrato, Italy

<sup>3</sup>Department of Life and Environmental Sciences, University of Cagliari, Cittadella Universitaria, SS 554, km 4.5, 09042 Monserrato, Italy

<sup>4</sup>Department of Mechanical, Chemical and Material Engineering, University of Cagliari. Piazza d'armi, 09123, Cagliari, Italy

<sup>‡</sup> Equally contributing authors.

\*davide.moi2@gmail.com (D.M.); fsecci@unica.it (F.S.); paola.caria@unica.it (P.C.).

### **Table of contents**

|                                                                           |           |
|---------------------------------------------------------------------------|-----------|
| <b>1. General remarks</b>                                                 | <b>S2</b> |
| <b>2. Cyclic voltammetry diagram of coumarins 2k and 2h</b>               | <b>S3</b> |
| <b>3. <sup>1</sup>H and <sup>13</sup>C NMR spectra of compounds 2a-2k</b> | <b>S4</b> |

## 1. General remarks

Unless stated otherwise, respectively the synthesis of compounds 2a-k were performed at the indicated temperature in a round bottom flask equipped with a stirring bar and a condenser if needed. Commercially available reagents were used as received unless otherwise noted. The salicylaldehydes 1 used in this work were purchased from Sigma Aldrich, TCI or Fluorochem.  $^1\text{H}$  NMR spectra were recorded on a Bruker Avance III HD 600 spectrometer (Bruker, Bremen, Germany) at 300.15 K using  $\text{CDCl}_3$  (ref. 7.27 ppm), as a solvent.  $^{13}\text{C}$  NMR were recorded on a Bruker Avance III HD 600 (Bruker, Bremen, Germany) at 126 MHz (ref.  $\text{CDCl}_3$  77.00 ppm) at 300.15 K using  $\text{CDCl}_3$ , as solvent. Chemical shifts ( $\delta$ ) are given in ppm. Coupling constant values (J) are reported in Hz. Infrared spectra were recorded on an FT-IR Bruker Equinox-55 spectrophotometer (Bruker, Bremen, Germany) and are reported in wavenumbers ( $\text{cm}^{-1}$ ). Low Mass Spectra Analysis were recorded on an Agilent-HP GC-MS (E.I. 70eV). High Resolution Mass Spectra (HRMS) were obtained using a Bruker High Resolution Mass Spectrometer (Bruker, Bremen, Germany) in fast atom bombardment ( $\text{FAB}^+$ ) ionization mode. Melting points were determined with a Büchi M-560 Analytical (Büchi, Flawil, Swiss). Thin layer chromatography was performed using 0.25 mm Aldrich silica gel 60-F plates. Flash chromatography was performed using Merk 70-200 mesh silica gel. Yields refer to chromatography and spectroscopically pure materials

## 2. Cyclic voltammetry of 2k and 2h

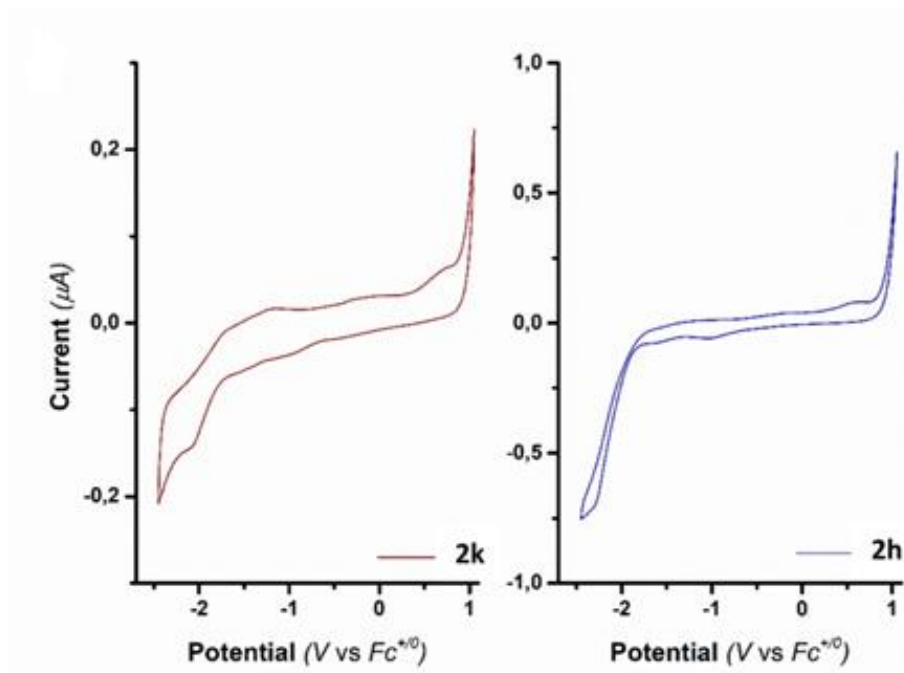

**Figure S1.** Cyclic voltammetry (CV) plots for coumarins 2k and 2h

### 3. $^1\text{H}$ and $^{13}\text{C}$ NMR characterization of compounds 2a-2k

2a: 6-fluoro-2-oxo-2H-chromene-3-carbonitrile

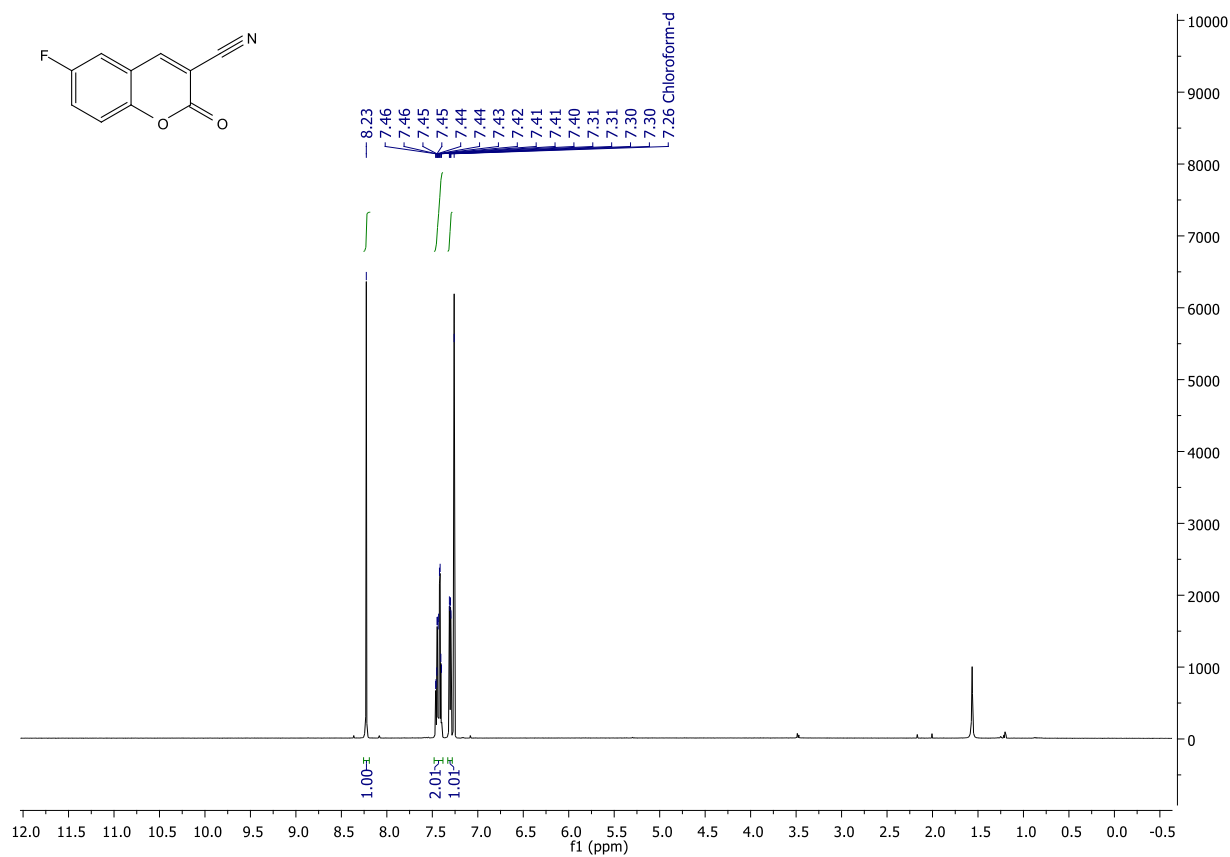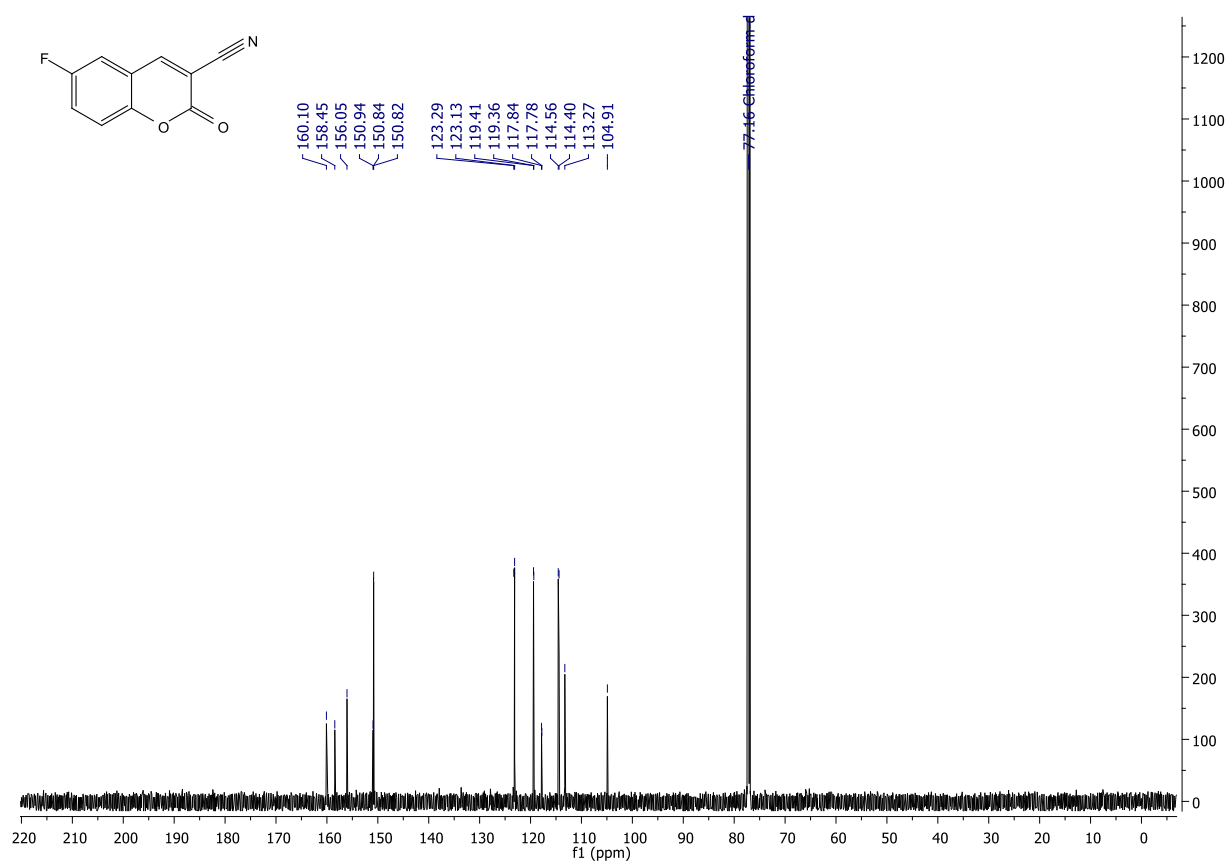

**2b:** Ethyl 6-chloro-2-oxo-2H-chromene-3-carboxylate

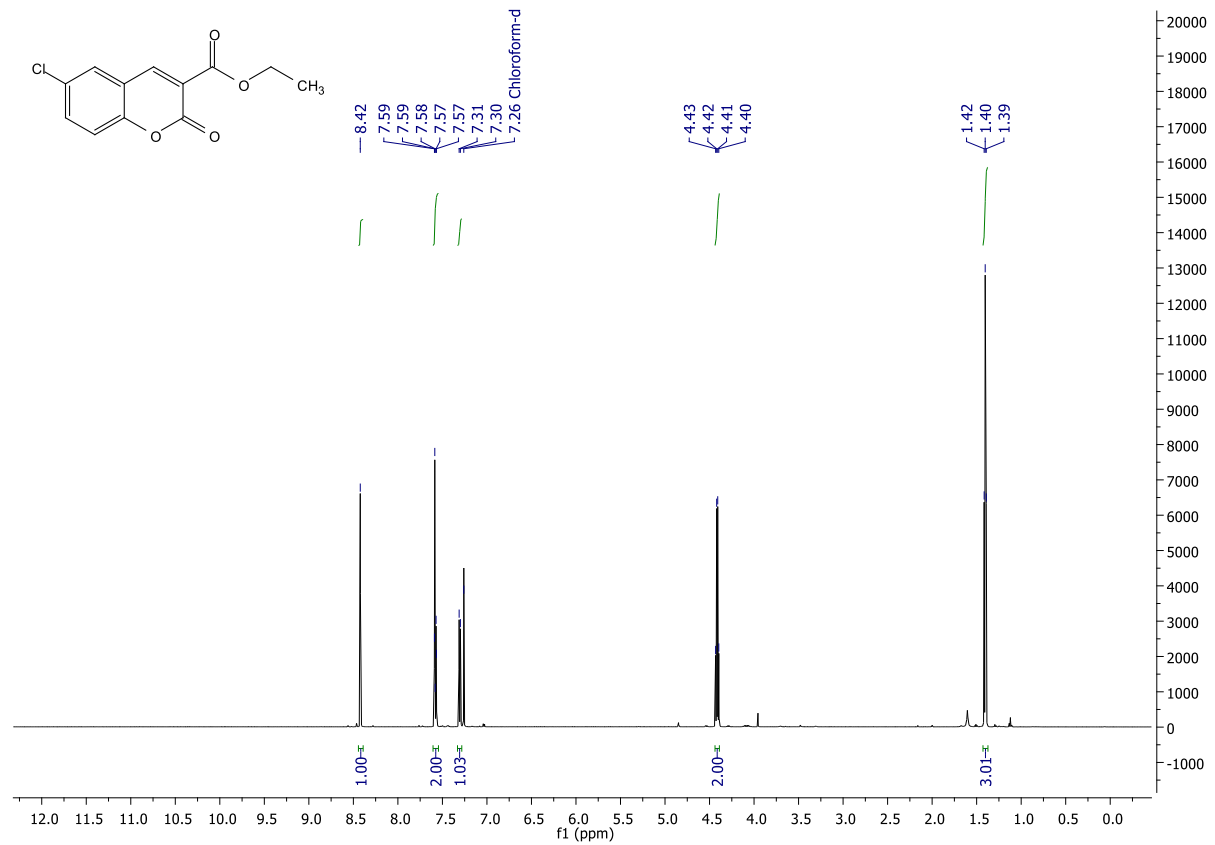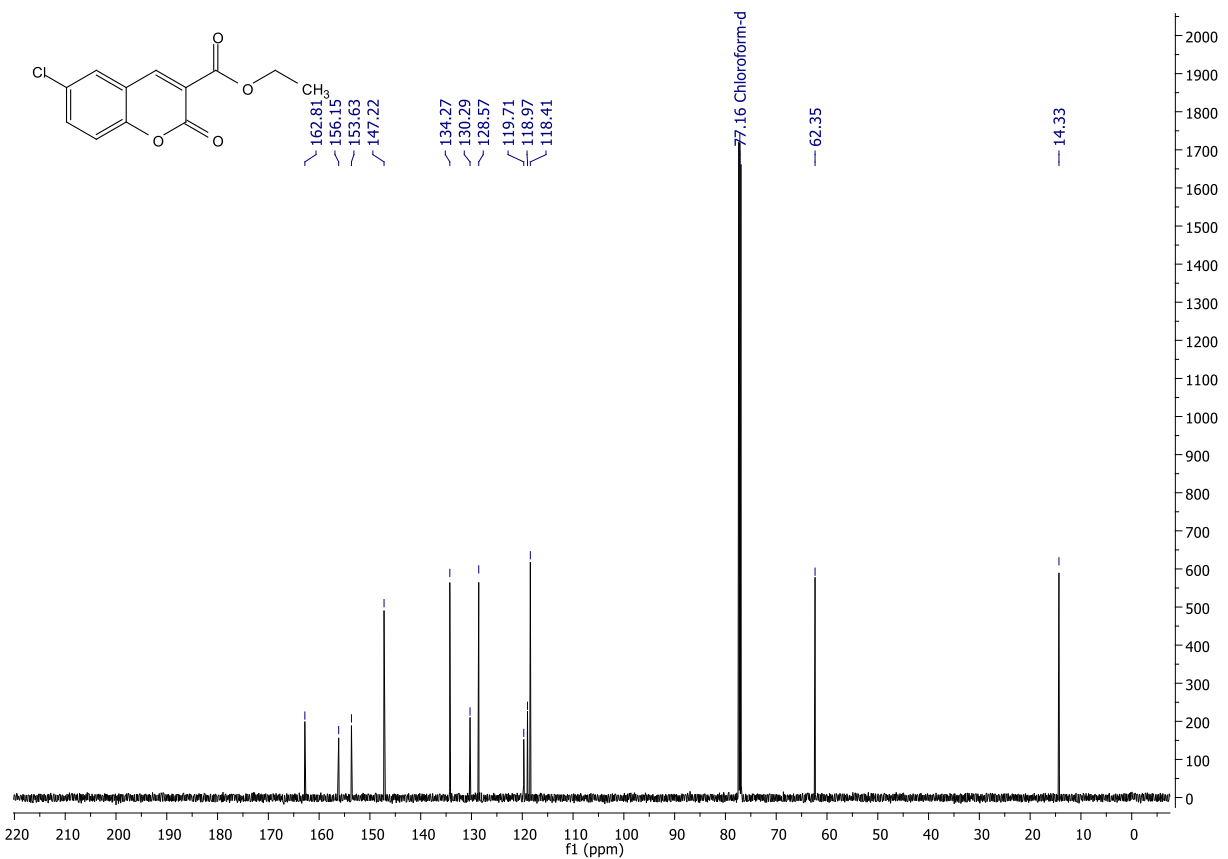

**2c: 6-chloro-2-oxo-2H-chromene-3-carbonitrile**

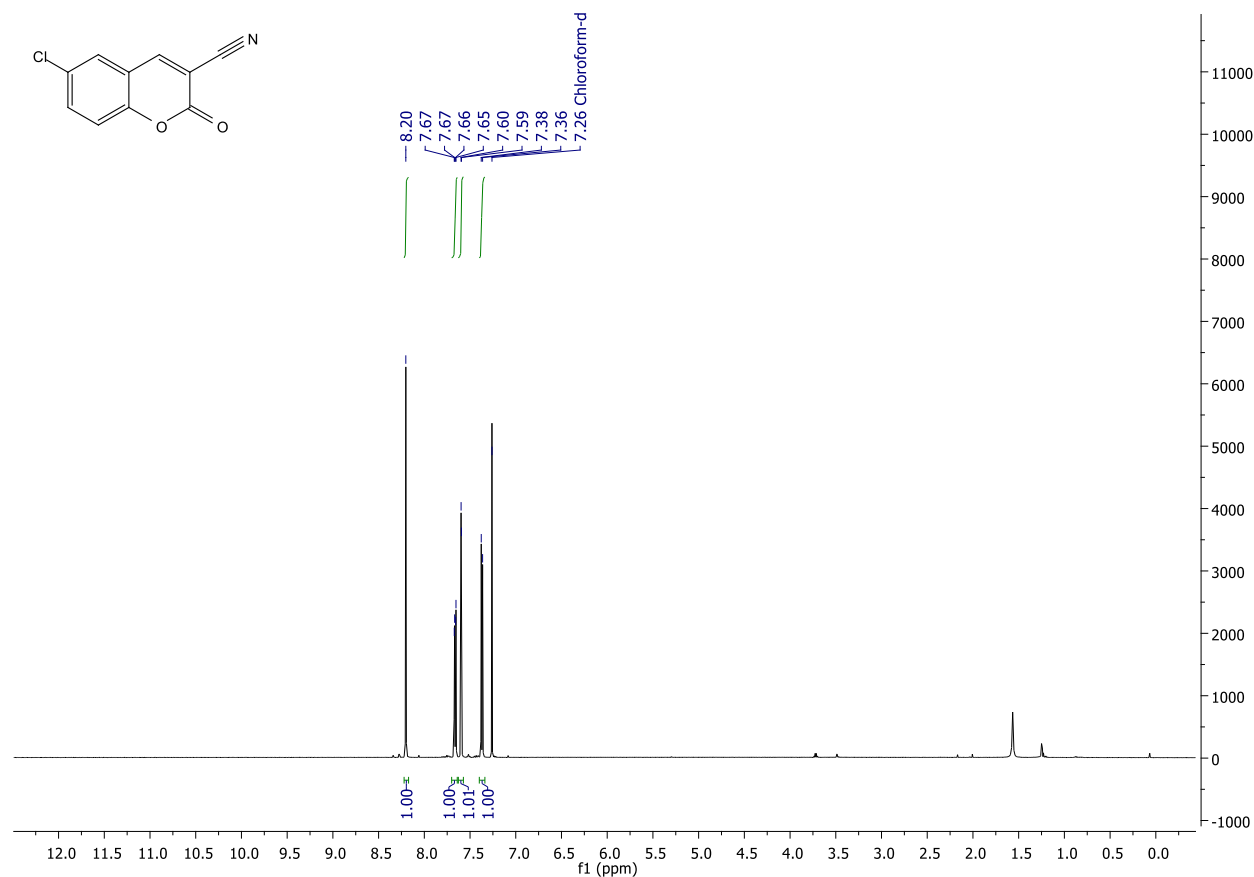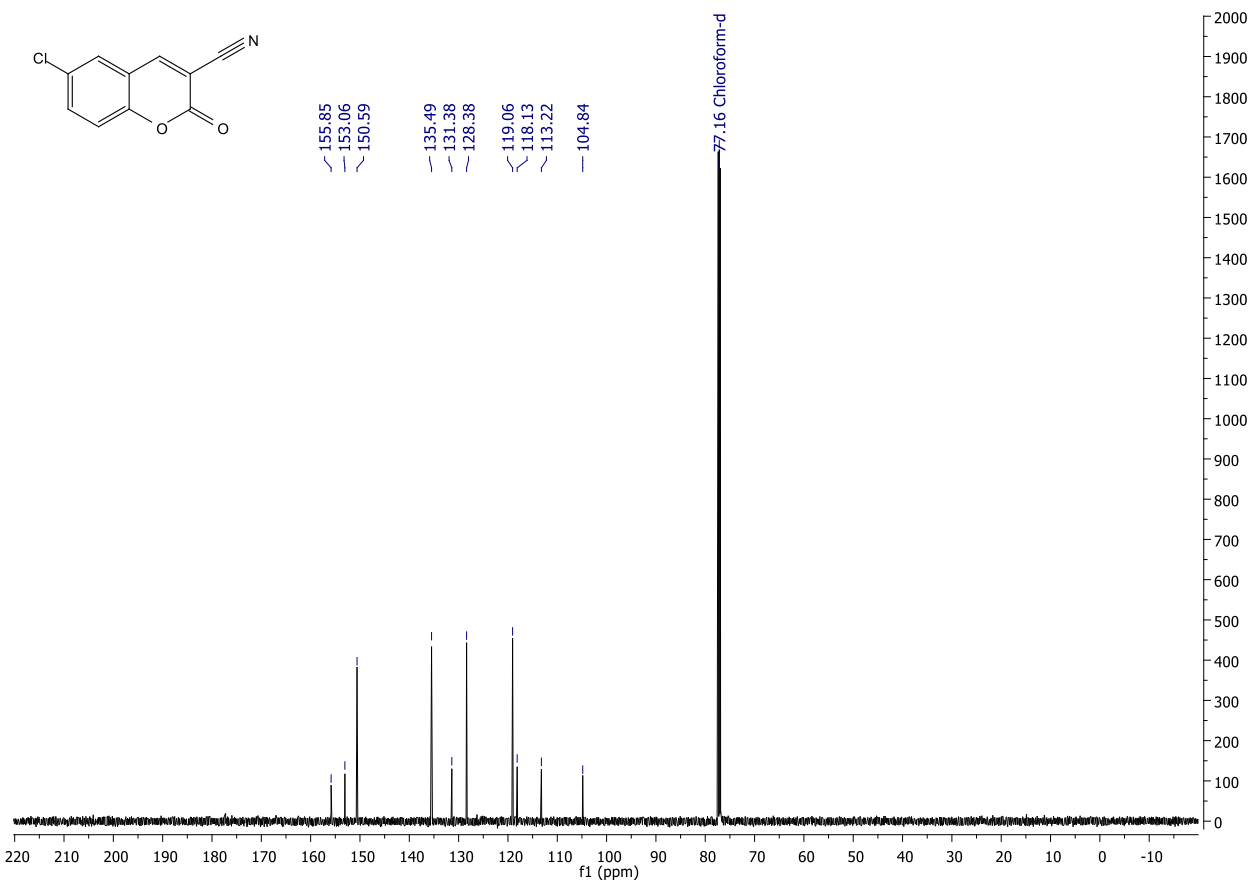

**2d:** Ethyl 6-bromo-2-oxo-2H-chromene-3-carboxylate

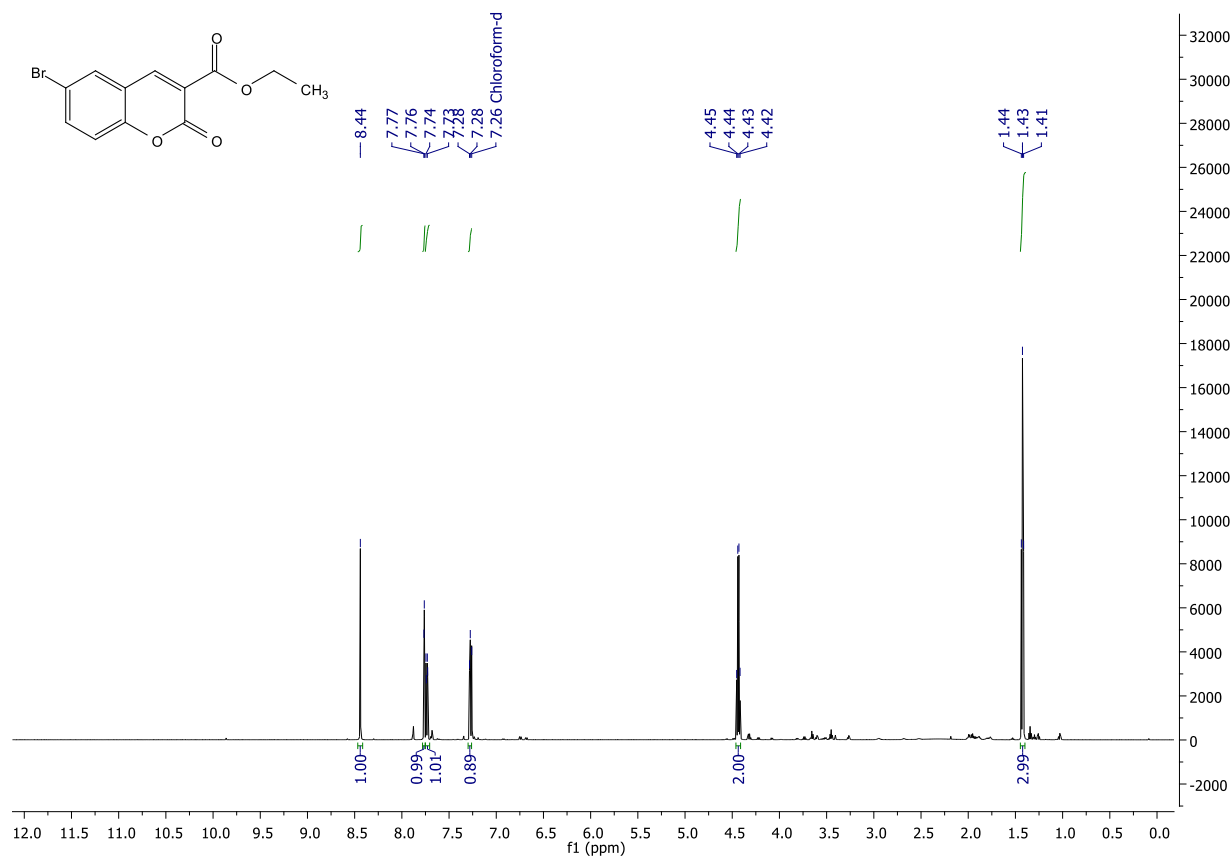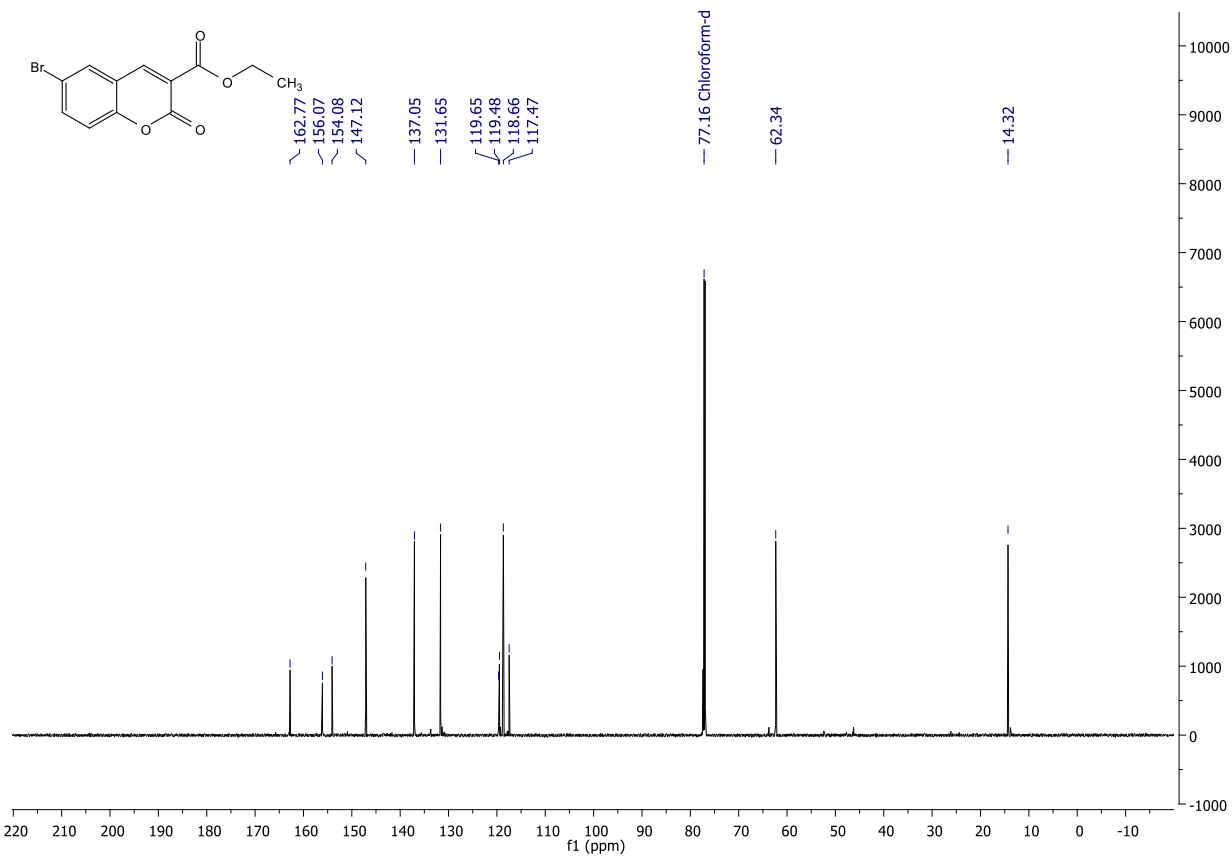

**2e:** 6-bromo-2-oxo-2*H*-chromene-3-carbonitrile

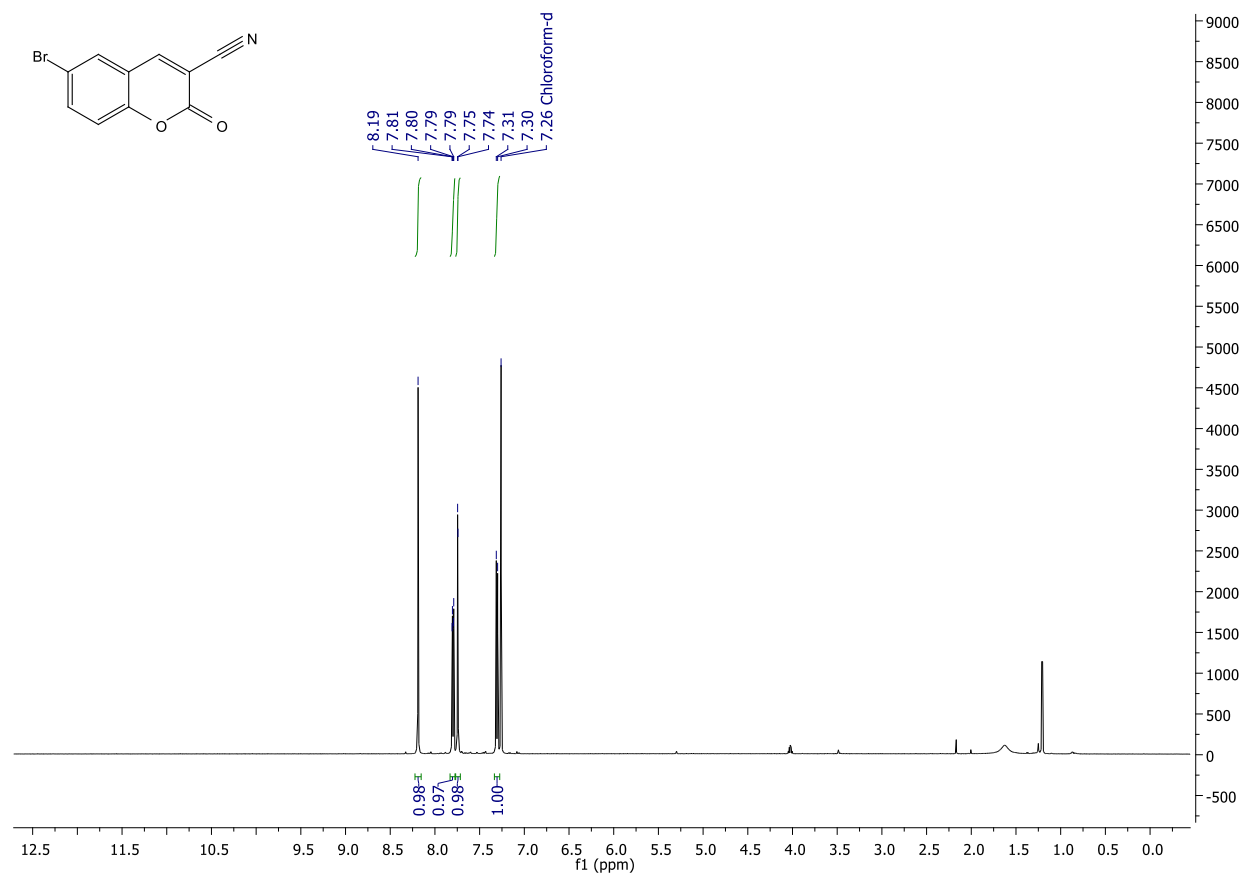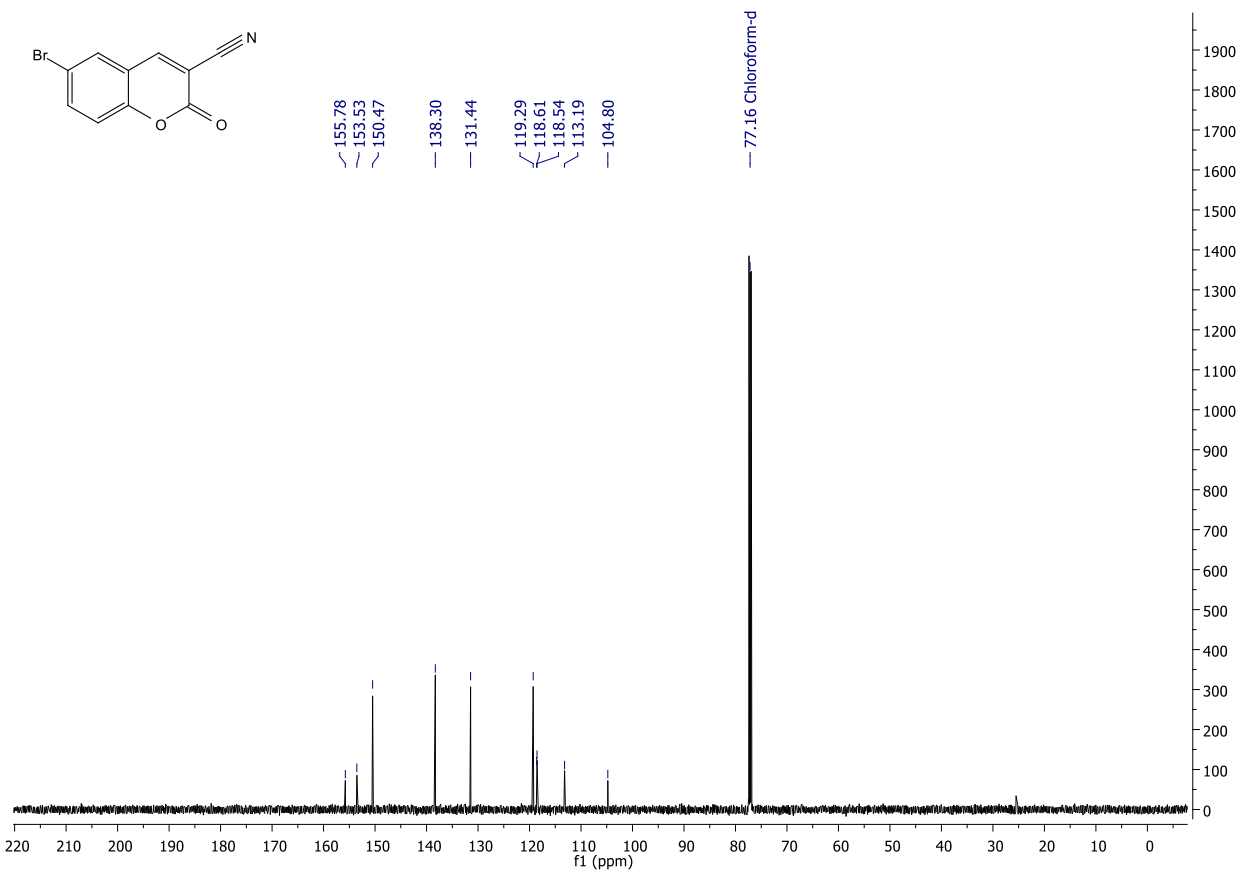



**2f:** 6-bromo-3-(methylsulfonyl)-2*H*-chromen-2-one

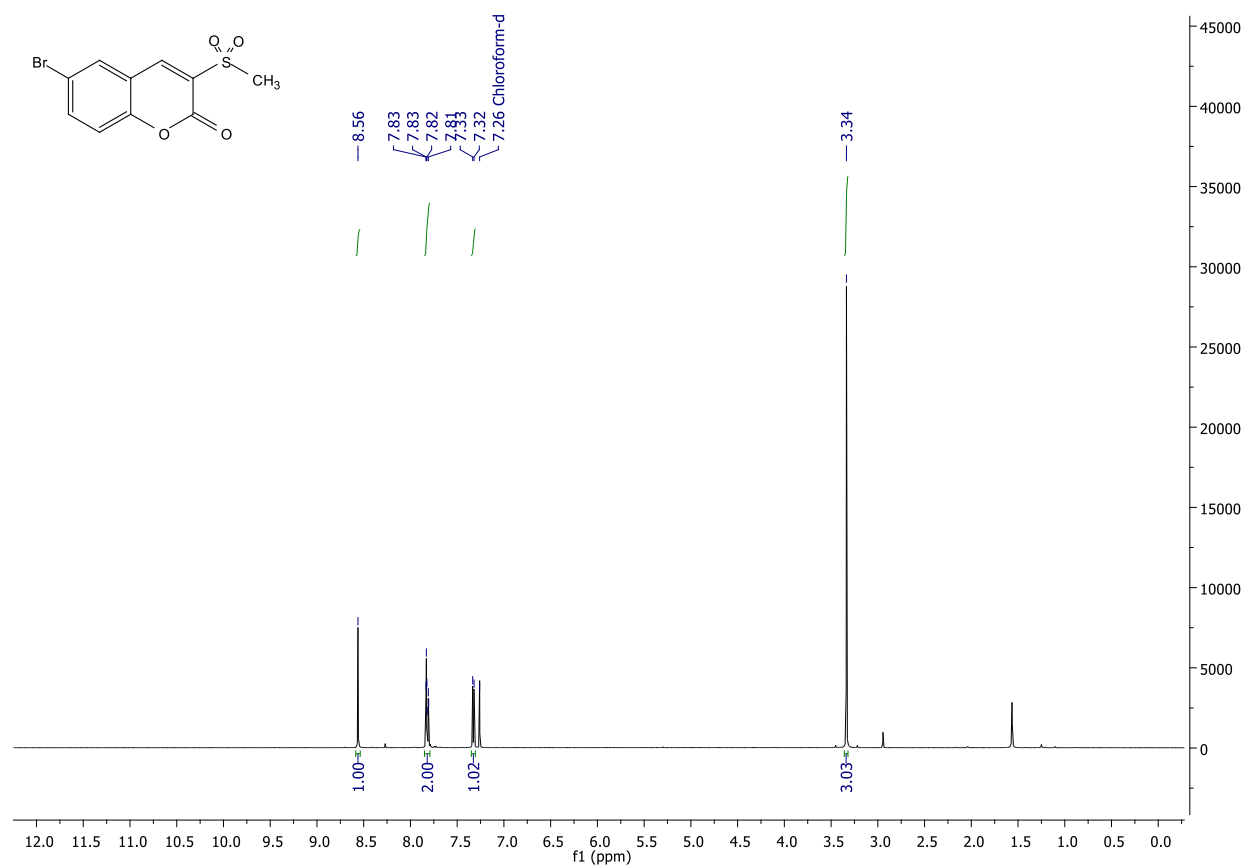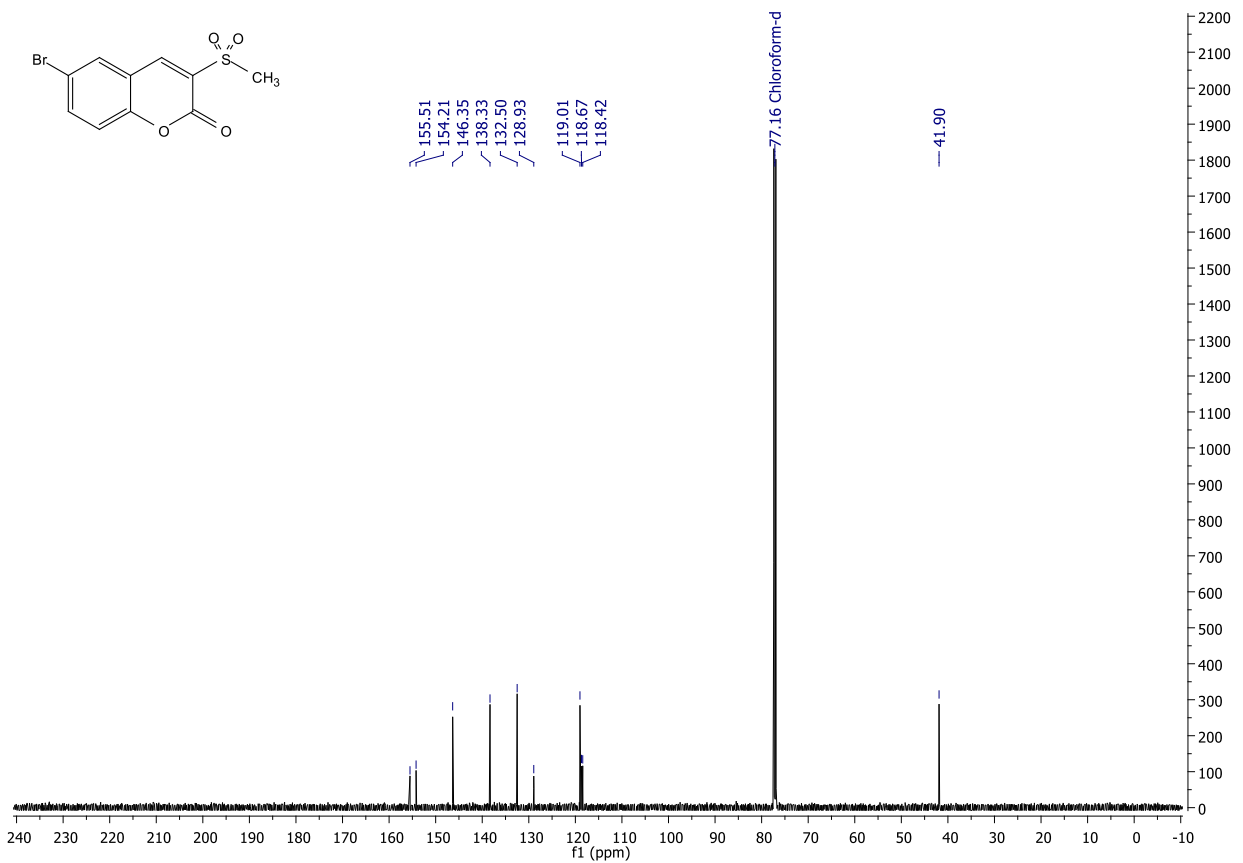

**2g:** Ethyl 6,8-dibromo-2-oxo-2H-chromene-3-carboxylate

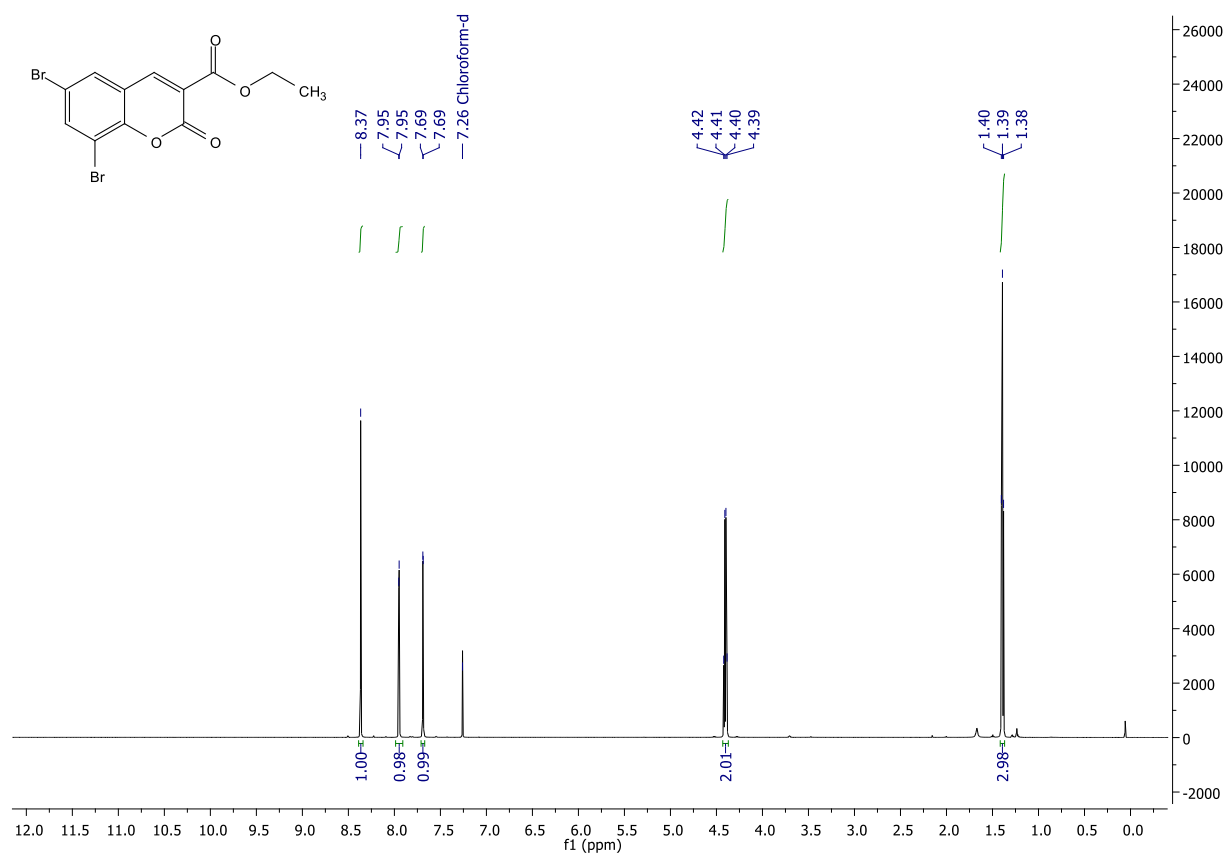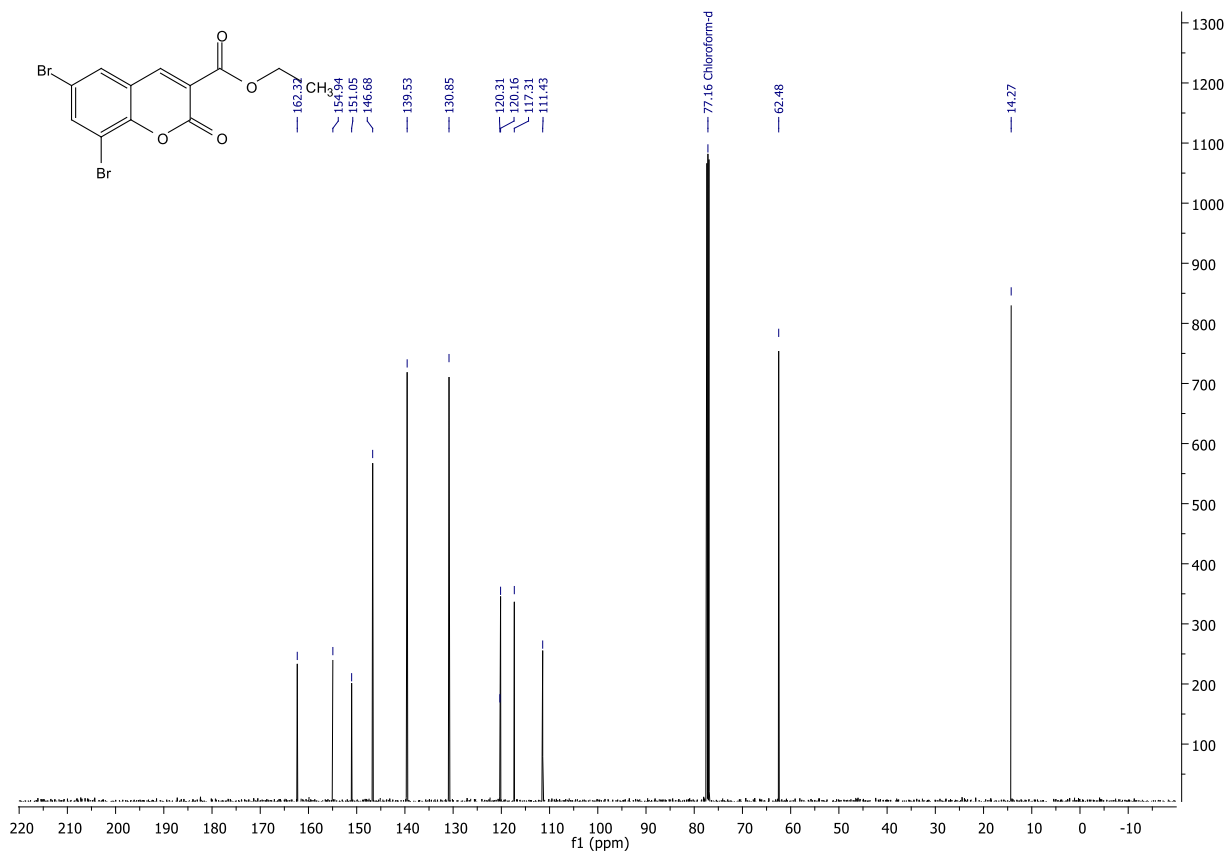

**2h:** 6,8-dibromo-2-oxo-2*H*-chromene-3-carbonitrile

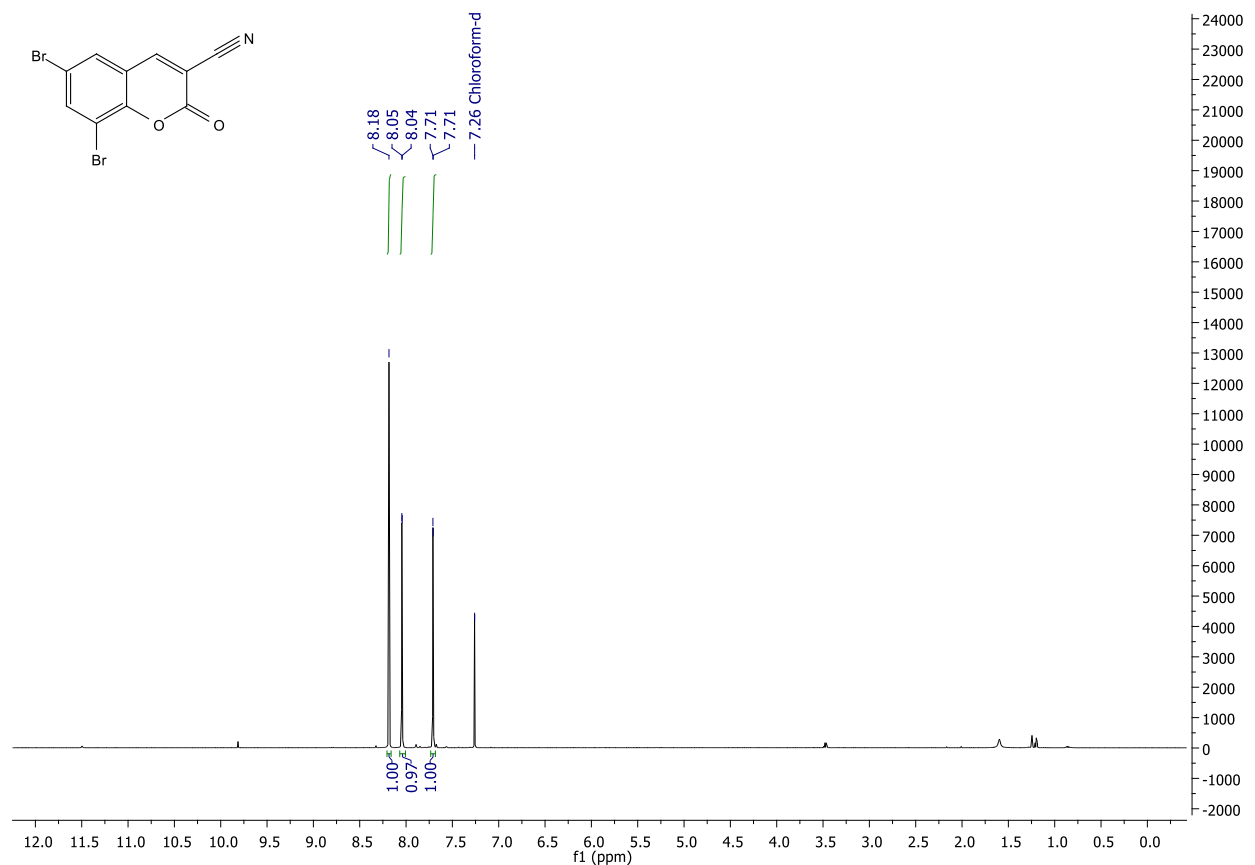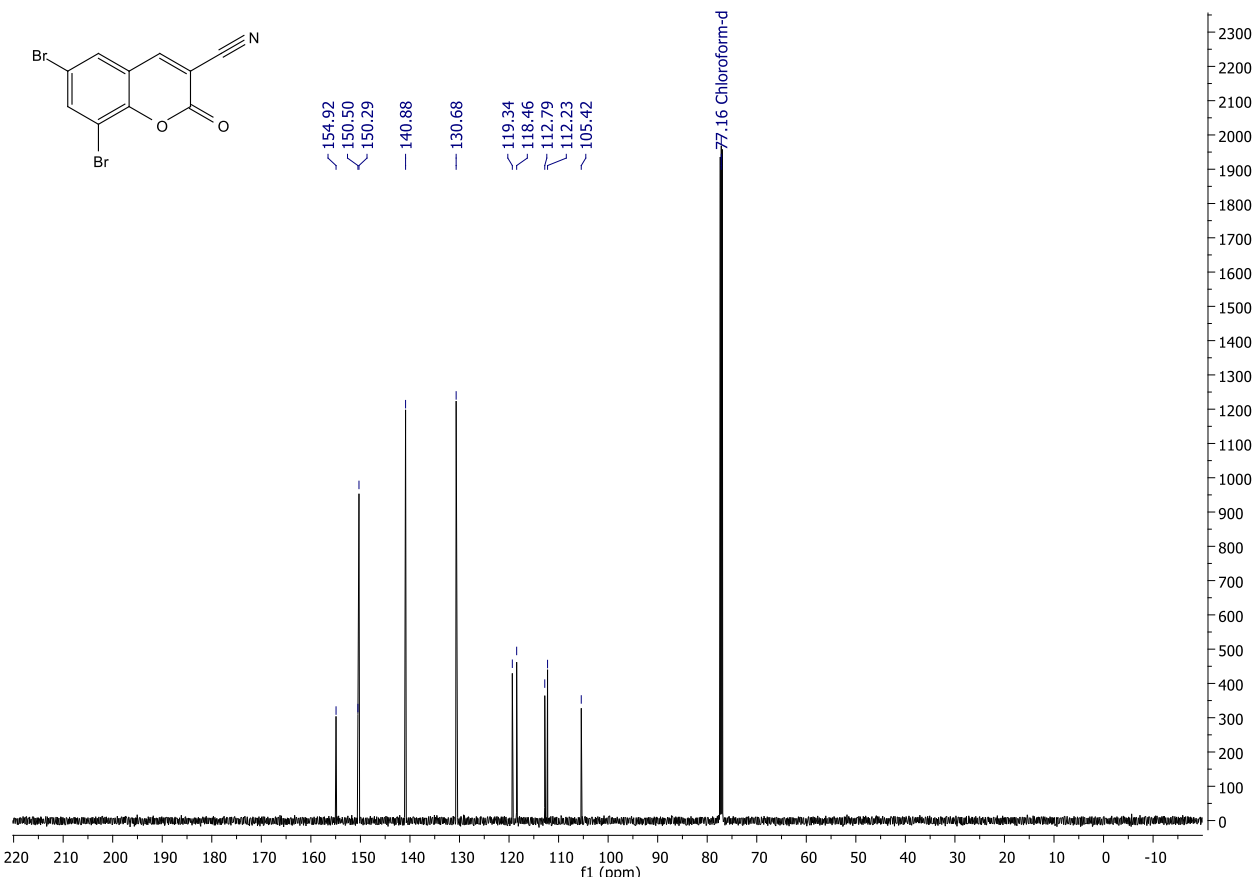

2i: ethyl 6,8-diiodo-2-oxo-2*H*-chromene-3-carboxylate

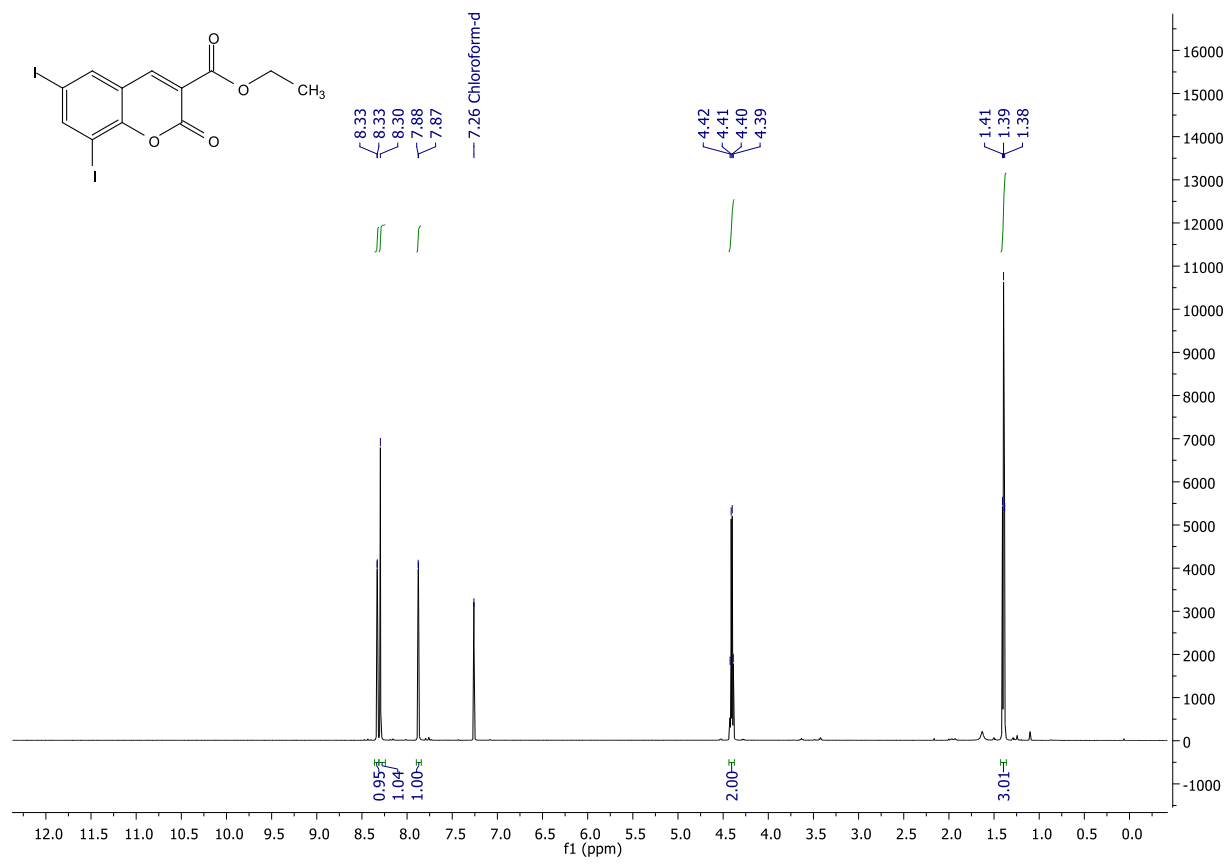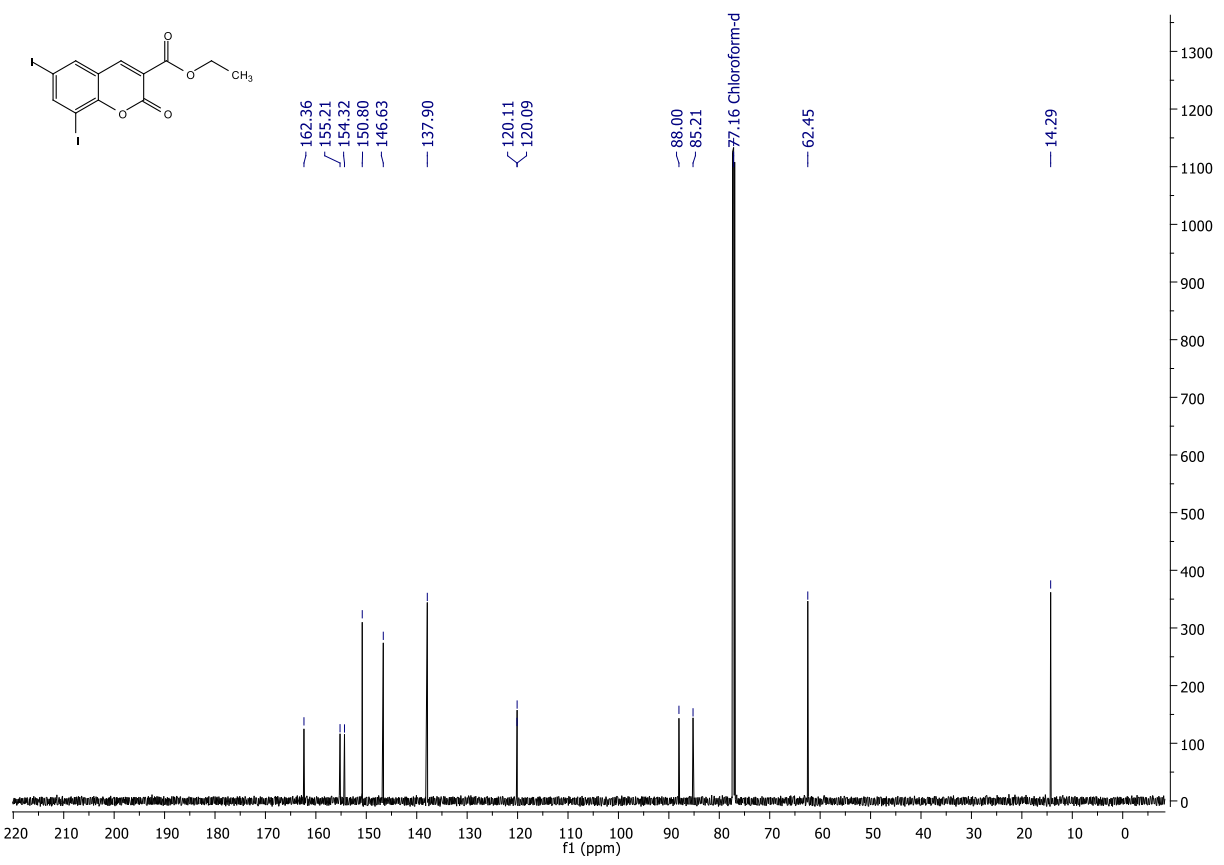

2j: 6,8-diiodo-2-oxo-2H-chromene-3-carbonitrile

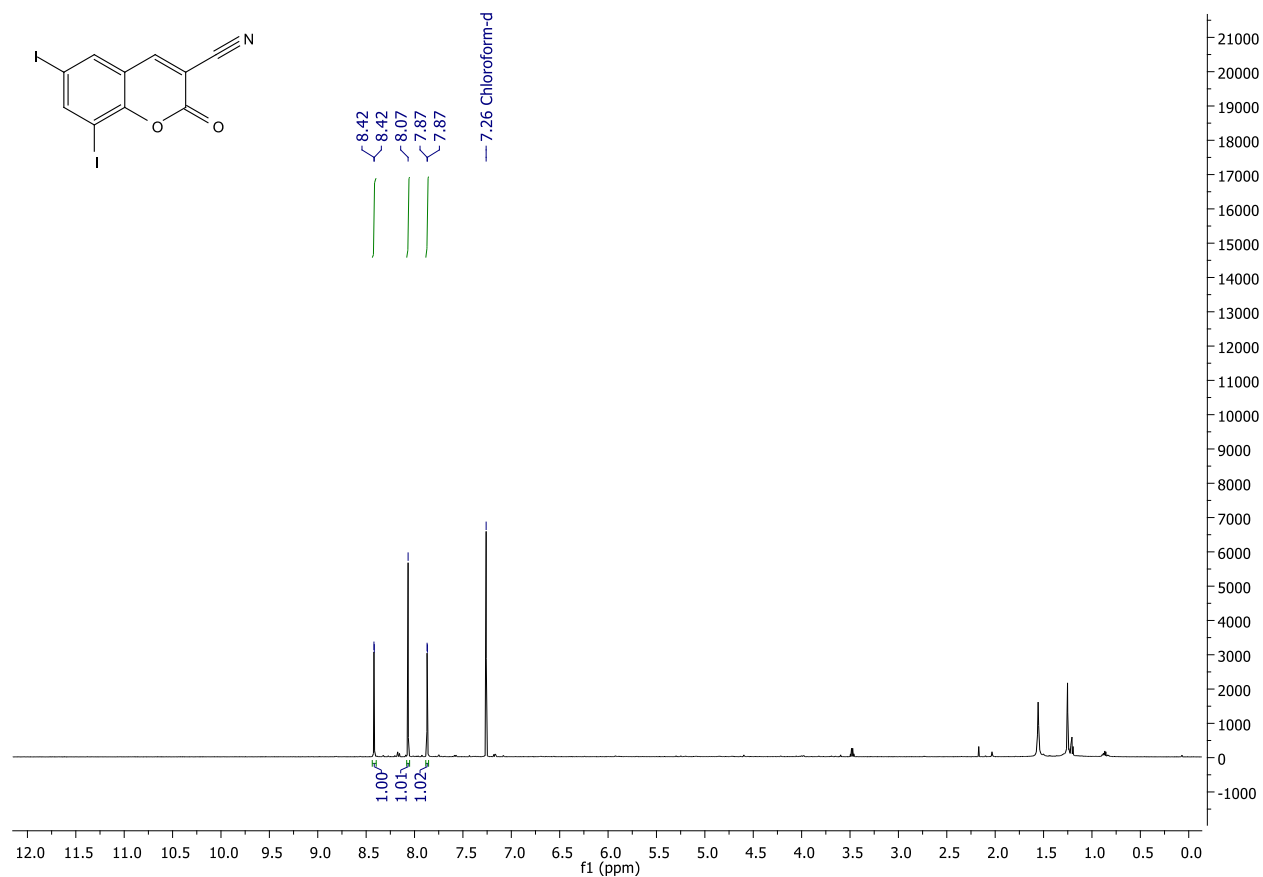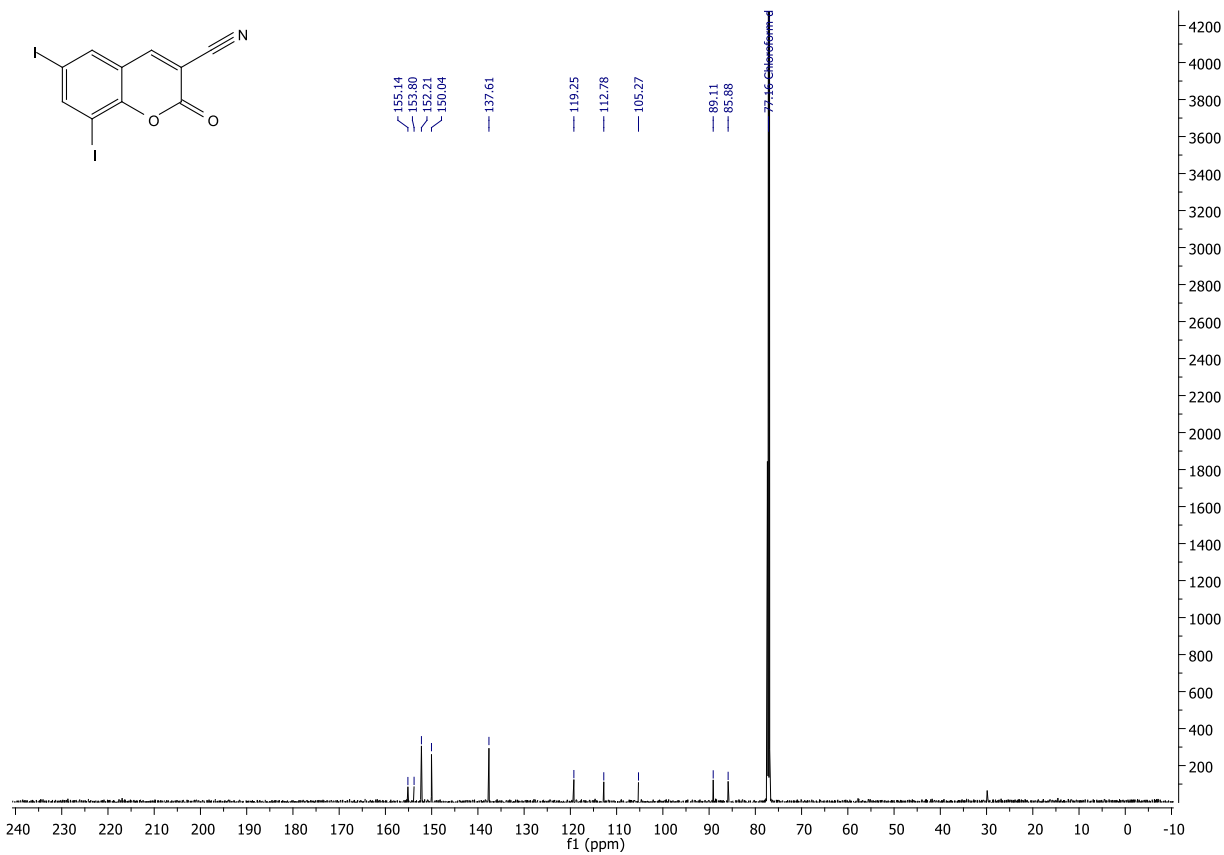

**2k: 6,8-diiodo-2-oxo-2H-chromene-3-carboxylic acid**

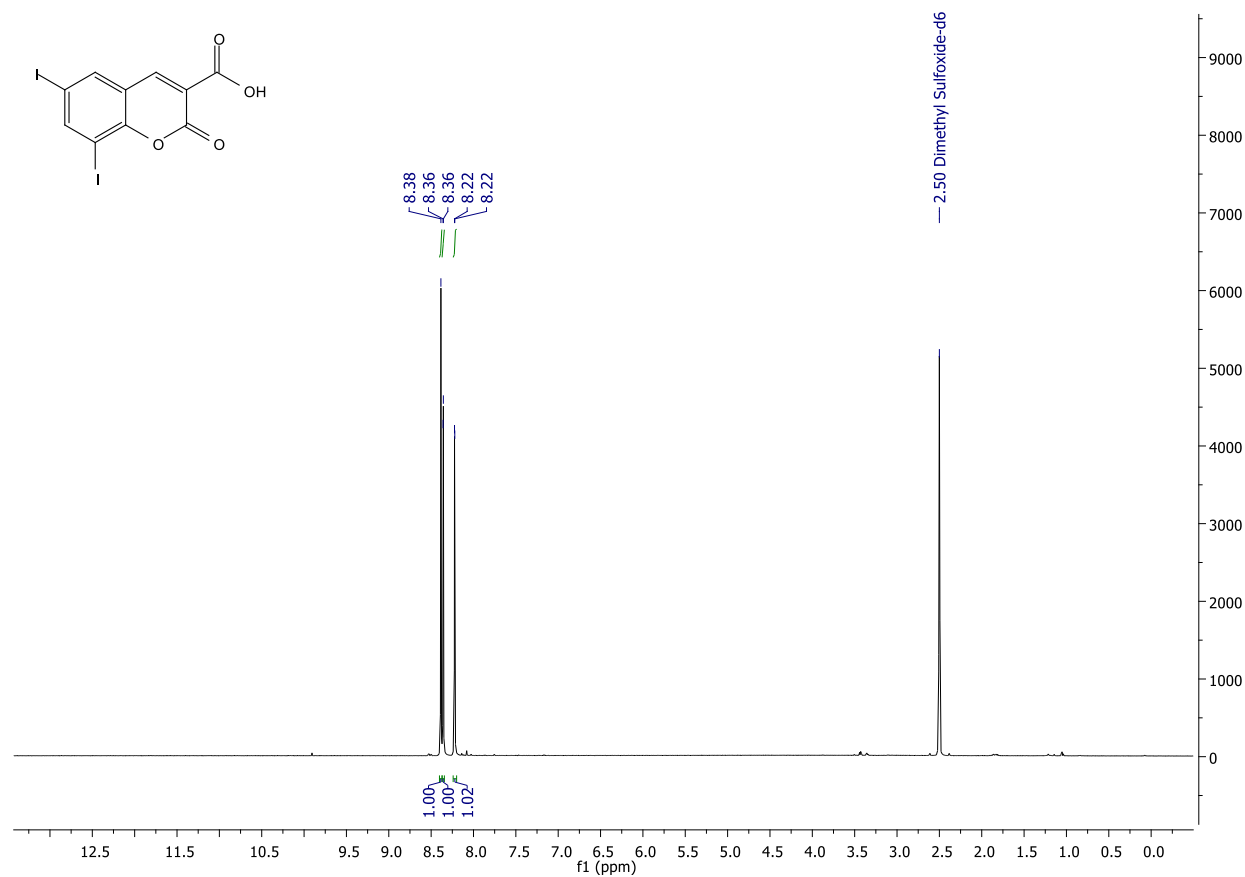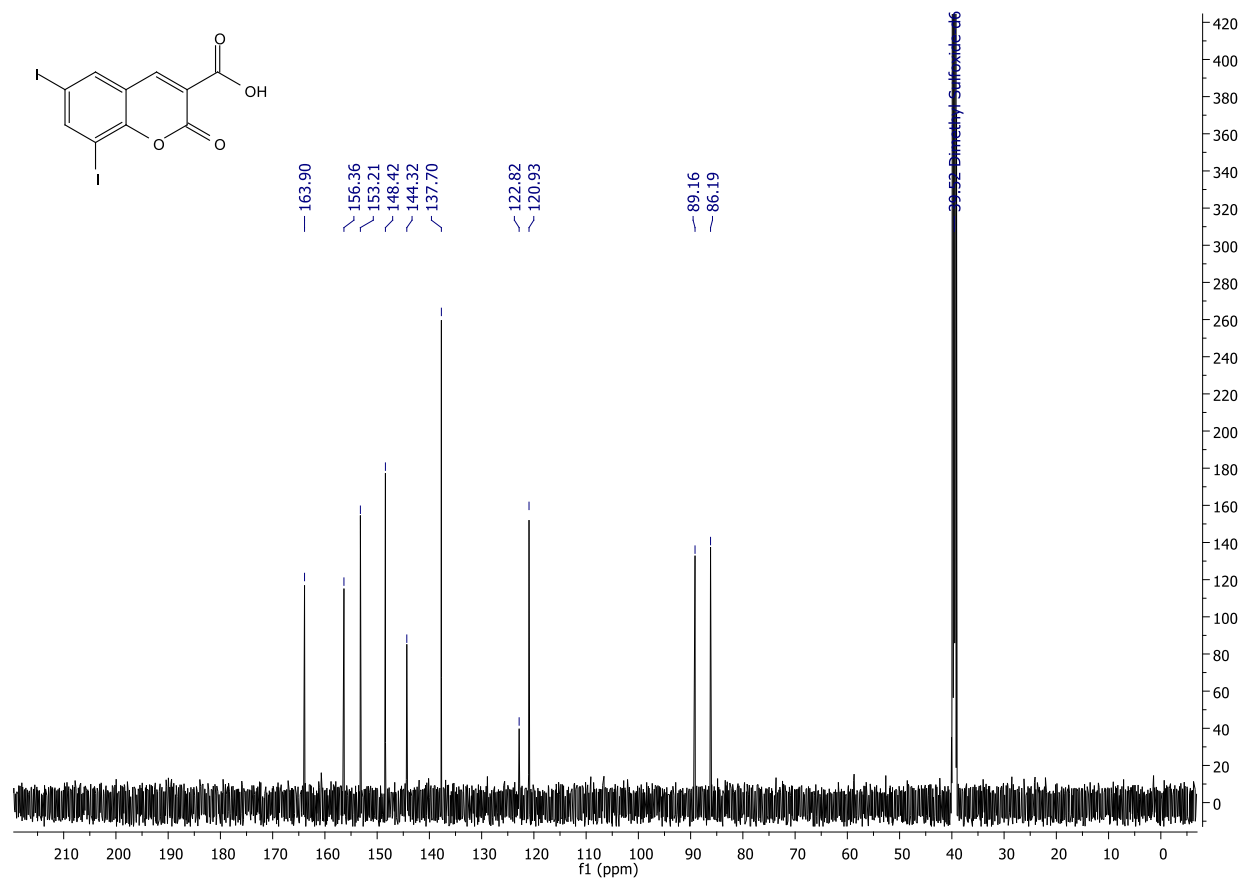

Supplement: s1 [file s1]
